# Supplementary material for: Catalyst-free vitrimer elastomers based on a dimer acid: robust mechanical performance, adaptability and hydrothermal recyclability
Source: Royal Society of Chemistry journal article supplement (doi:10.1039/c9gc04080c), 2019-12-23
Supplement: c9gc04080c1.pdf [file c9gc04080c1.pdf]

## Supporting Information

### Catalyst-Free Vitrimer Elastomer based on Dimer Acid: Robust Mechanical Performance, Adaptivity and Hydrothermal Recyclability

Yingyi Li,<sup>†ab</sup> Tuan Liu,<sup>†b</sup> Shuai Zhang,<sup>b</sup> Lin Shao,<sup>b</sup> Mingen Fei,<sup>b</sup> Hui Yu,<sup>\*a</sup> Jinwen Zhang<sup>\*b</sup>

<sup>a</sup> School of Textile Materials and Engineering, Wuyi University, Jiangmen, Guangdong 529020, P. R. China

<sup>b</sup> School of Mechanical and Materials Engineering, Composite Materials and Engineering Center, Washington State University, Pullman, Washington 99164, United States

<sup>†</sup> Yingyi Li and Tuan Liu contributed equally to this work.

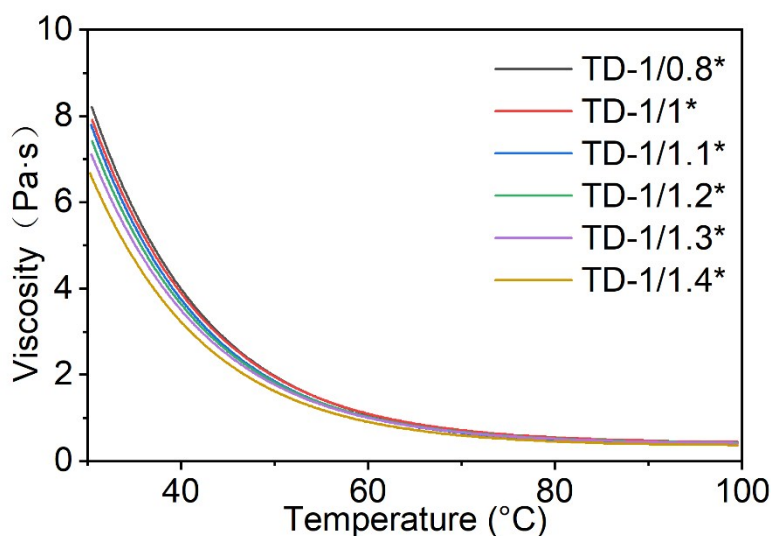

**Figure S1** Viscosity vs temperature of TD elastomers before curing. The test was performed at a constant heating rate of 3 °C min<sup>-1</sup>, and the shear rate was 1 s<sup>-1</sup>. All compositions were liquid and exhibited a relatively low viscosity of blow ~ 10 Pa·s at 30 °C.

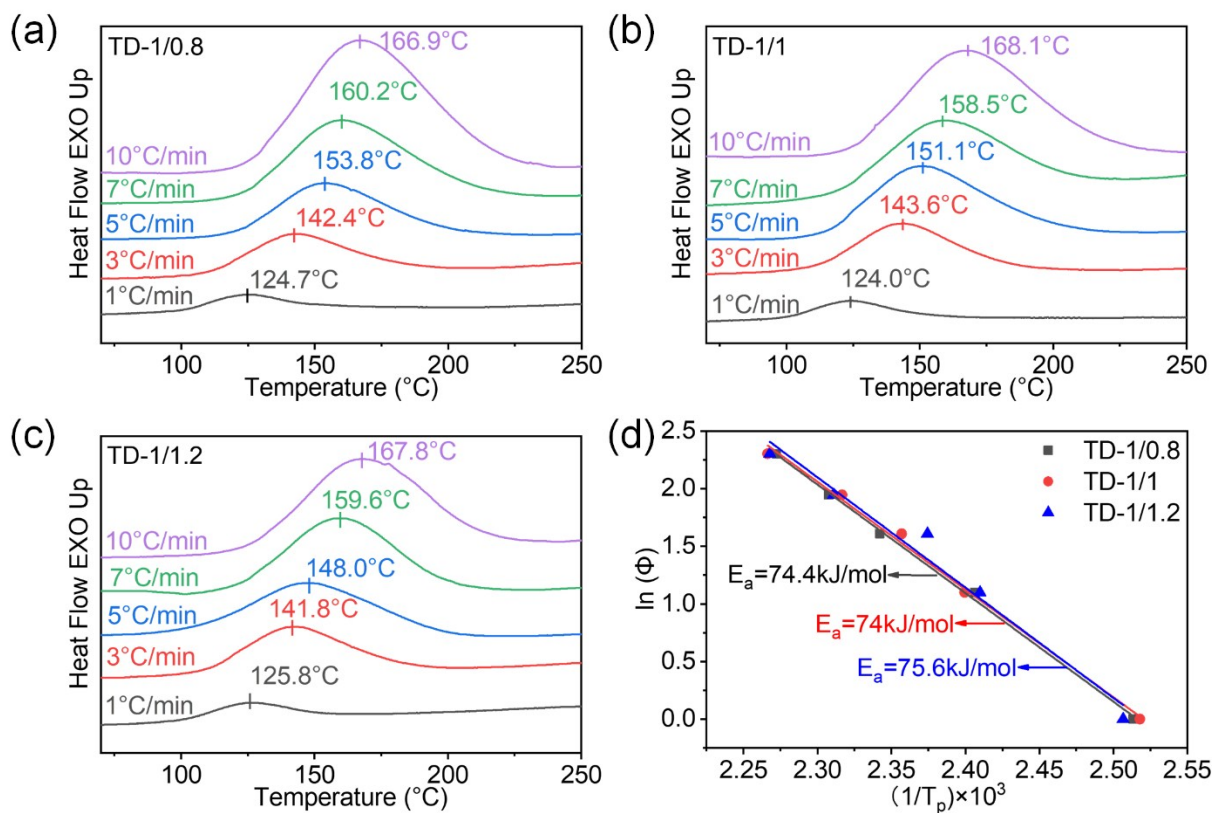

**Figure S2** DSC thermograms of nonisothermal curing of TGDDM and DA at different E/COOH ratios of (a) 1:0.8, (b) 1:1, (c) 1:1.2; (d) fitting of  $T_p$  and  $\phi$  to Eq. 4.

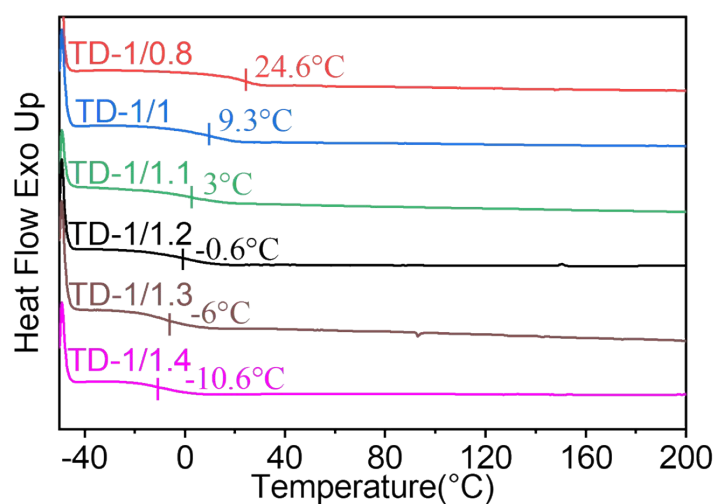

**Figure S3** Full DSC thermograms of Figure 3a.

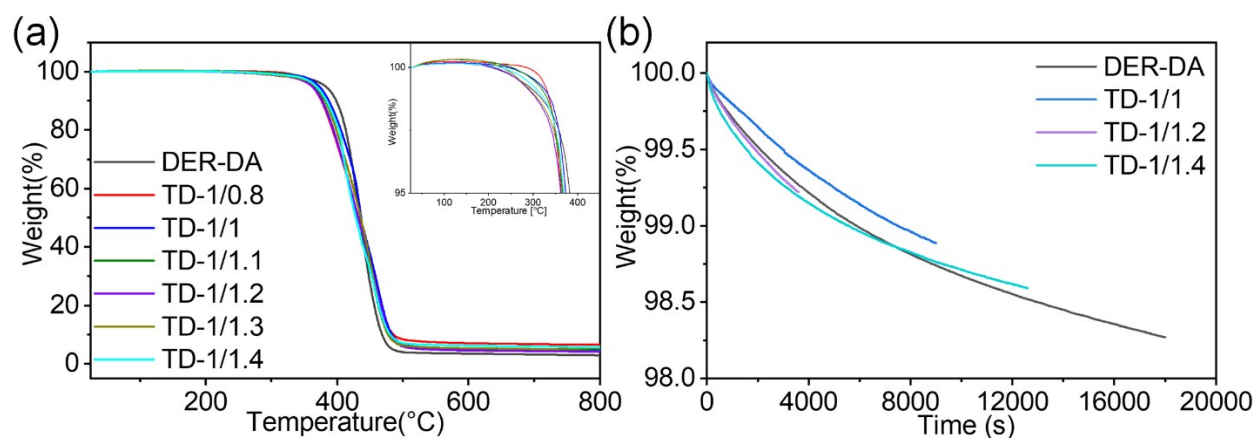

**Figure S4** (a) TGA heating curves of the cured polymers; (b) TGA isothermal curves of the cured polymers at 200 °C.

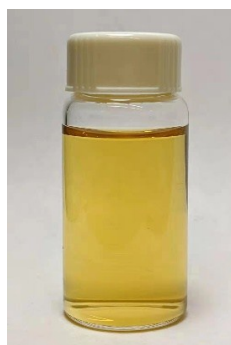

**Figure S5** The degraded polymer solution after degradation in 0.5 M NaOH solution for 5 h.

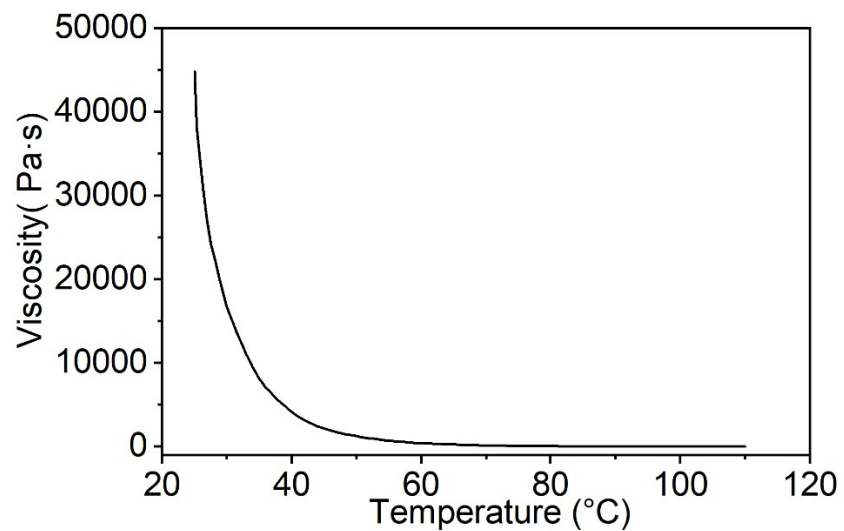

**Figure S6** Viscosity vs temperature of the decomposed TD-1/1. The heating rate was 3 °C min<sup>-1</sup>, and the shear rate was 1 s<sup>-1</sup>.

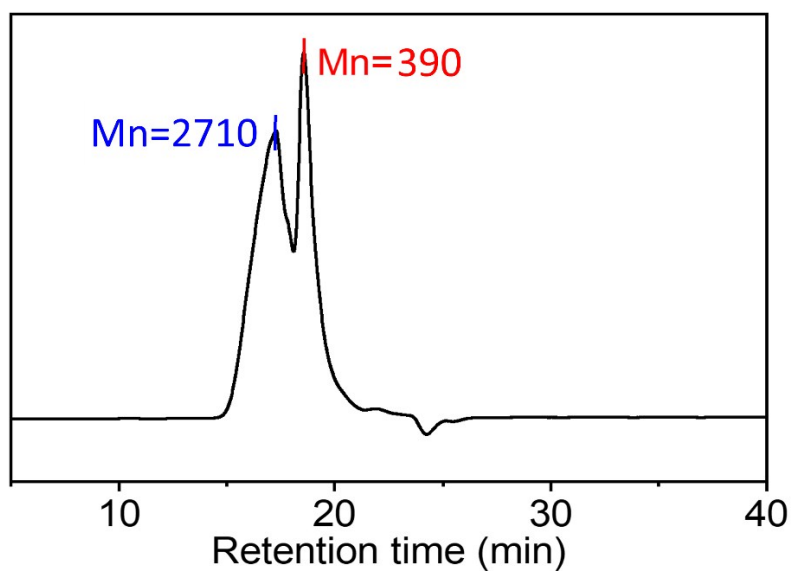

**Figure S7** GPC curve of the decomposed TD-1/1. The degradation reaction was performed in pure water at 190 °C for 5 h. The peak molecular weights are labeled in the curve.

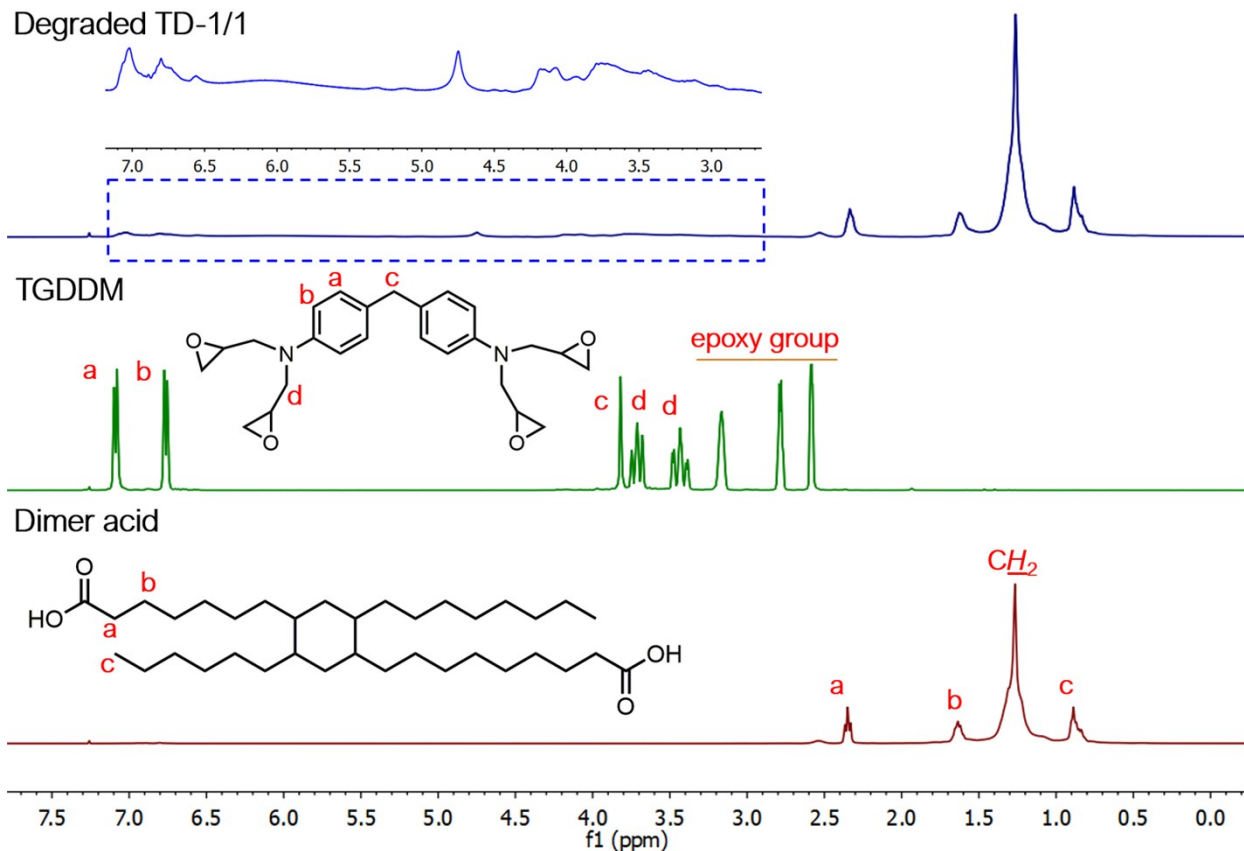

**Figure S8** <sup>1</sup>H-NMR spectra of the degraded TD-1/1, TGDDM, and dimer acid.

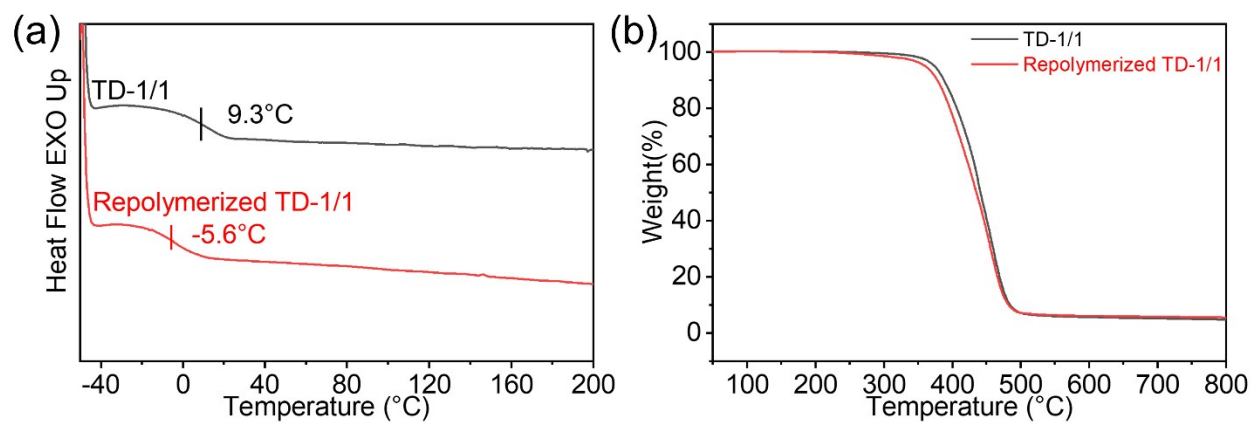

**Figure S9** (a) DSC and (b) TGA heating curves of TD-1/1 and the repolymerized TD-1/1 (rTD-1/1).
